# Supplementary material
Source: PubMed Central journal article supplement (PMC1976197)
Supplement: pnas_0704132104_2.pdf [file pnas_0704132104_2.pdf]

\*\*\*\*\*

Rv0636 1 MALREFSSVKVGDQLPEKTYPLTRQDLVNYAGVSGDLNPIHWDDDEIAKVVGLDTAIAHGMLTMGIGGGYVTSWVGDP-----GAVTEYN  
Rv0637 1 MALK--TDIRGMIWRYPDYFIVGREQCREFARAVKCDHPAFSEEAADLGYDALVAPLTFVTILAKYVQLDEFERHVDVGMETMQIVQVD  
Rv0635 1 VALS--ADIVGMHYRYPDHYEVEREREKIREYAVAVQNDDAWYFEEDGAAELGYKGLLAPLTFICVFGYKAQAAFEKHANIAATAEAQIVQVD

Rv0636 85 VRFTAVVPVPNDGKGAELVFNGRVKSVDPESSKSVTIALTATTGGKKIFGRAIASAKLA-----  
Rv0637 89 QRFVFHKPVLGDKLWARMDIHSVDERFGADIVVTRNLCTNDDGELVMEAYTTLMGQQGDGSARLKWDKESGQVIRTA  
Rv0635 89 QVLKFEKPIVAGDKLYCDVYVDSVREAHGTQIIVTKNIVTNEEGDLVQETYTTLAGRAGE-----DGE-GFSDGAA
