# Supplementary material
Source: PubMed Central journal article supplement (PMC1976197)

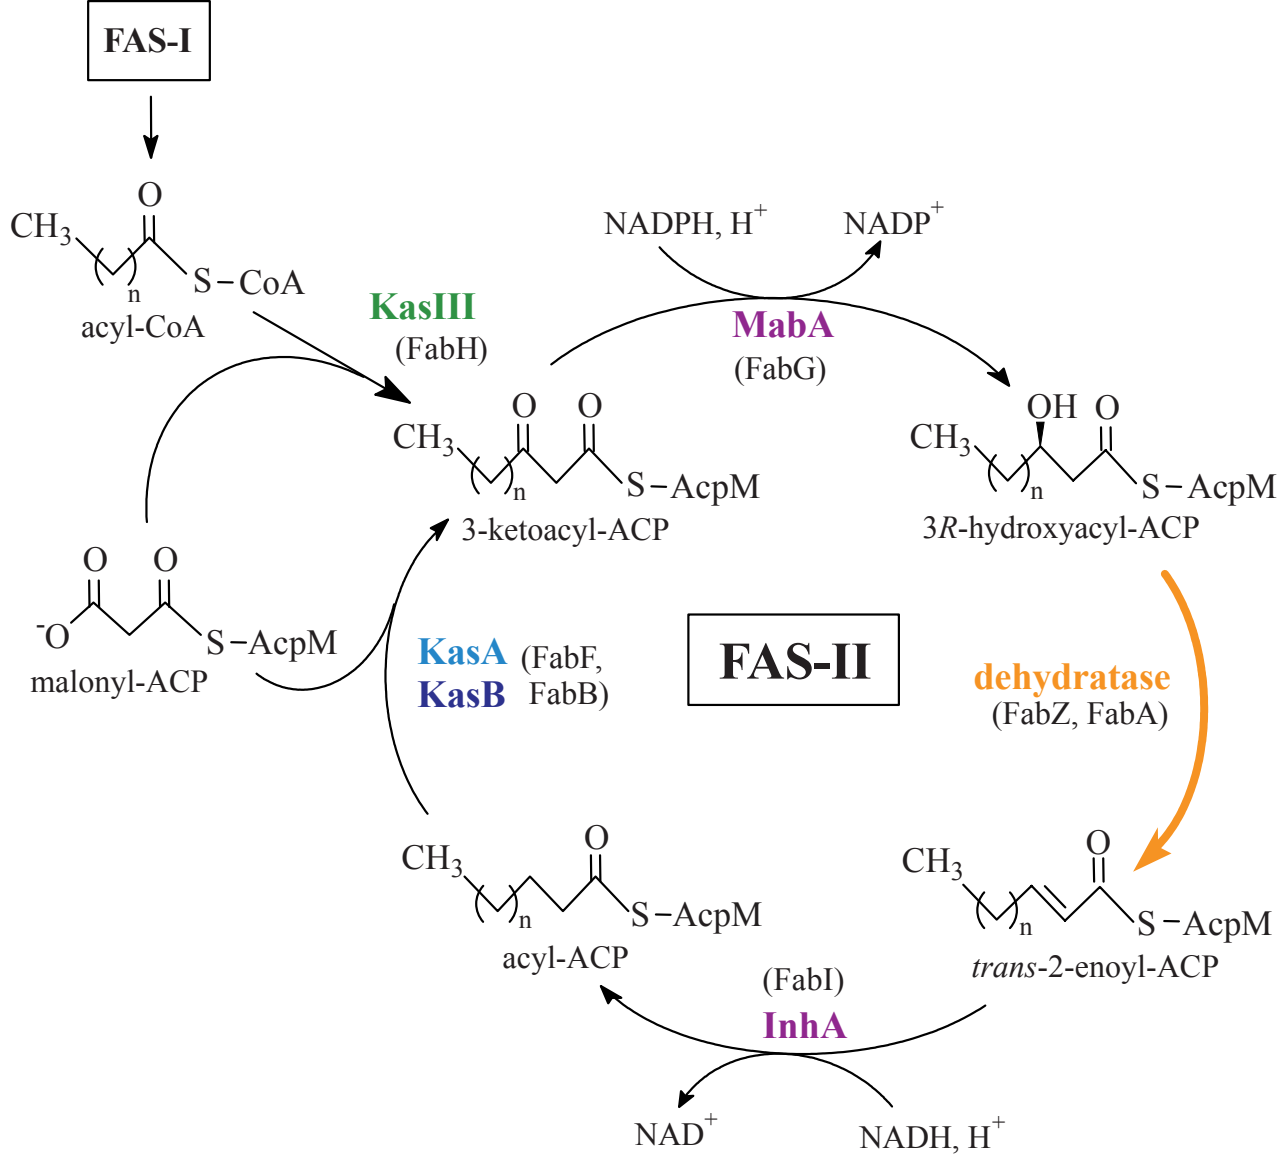

Supplement: pnas_0704132104_1.pdf [file pnas_0704132104_1.pdf]

**A**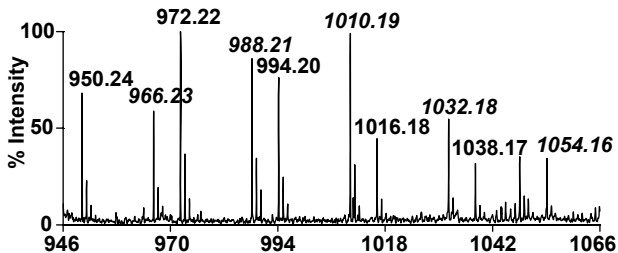**B**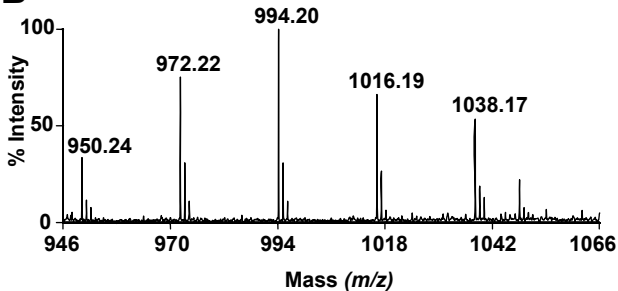

Supplement: pnas_0704132104_4.pdf [file pnas_0704132104_4.pdf]

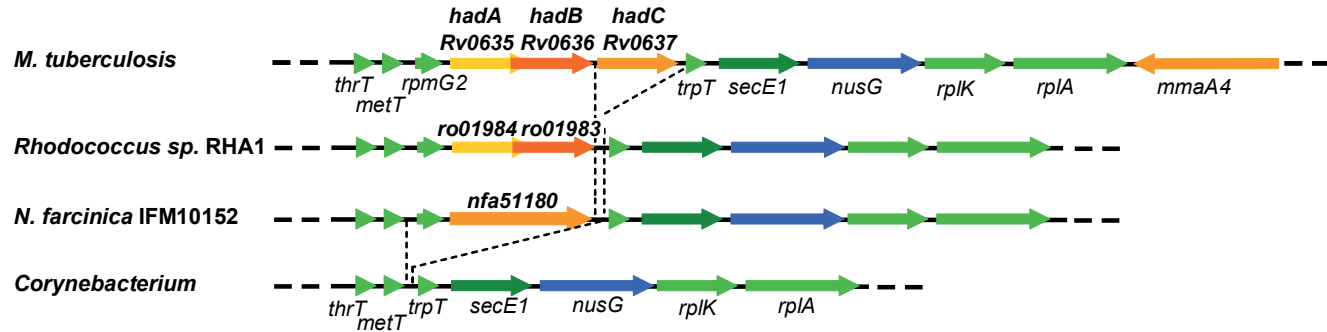

Supplement: pnas_0704132104_5.pdf [file pnas_0704132104_5.pdf]
